# Supplementary material for: Nanocellulose/wood ash-reinforced starch–chitosan hydrogel composites for soil conditioning and their impact on pea plant growth
Source: Royal Society of Chemistry journal article supplement (doi:10.1039/d3ra08725e), 2024-01-01
Supplement: d3ra08725e1.pdf [file d3ra08725e1.pdf]

## Supplementary Data

### Nanocellulose/wood ash-reinforced starch-chitosan hydrogel composites for soil conditioning and their impact on pea plant growth

Dure Najaf Iqbal <sup>1\*</sup>, Zaryab Tariq <sup>1</sup>, Boiz Philips <sup>1</sup>, Ayesha Sadiqa <sup>1</sup>, Muhammad Ahmad <sup>2</sup>, Khairia Mohammed Al-Ahmary <sup>3</sup>, Ijaz Ali <sup>4</sup>, Mahmood Ahmed <sup>2\*\*</sup>

<sup>1</sup> Department of Chemistry, The University of Lahore, Lahore-Pakistan

<sup>2</sup> Department of Chemistry, Division of Science and Technology, University of Education, Lahore-54770, Pakistan

<sup>3</sup> Department of Chemistry, College of Science, University of Jeddah, Jeddah, Saudi Arabia

<sup>4</sup> Centre for Applied Mathematics and Bioinformatics (CAMB), Gulf University for Science and Technology, Hawally, Kuwait.

**Running Title:** Starch-chitosan@nanocellulose/wood ash hydrogel composites as soil conditioner

To whom correspondence should be addressed

---

\* Dure Najaf Iqbal

[dure.najaf@chem.uol.edu.pk](mailto:dure.najaf@chem.uol.edu.pk)

\*\*Mahmood Ahmed, PhD

[mahmood.ahmed@ue.edu.pk](mailto:mahmood.ahmed@ue.edu.pk), [mahmoodresearchscholar@gmail.com](mailto:mahmoodresearchscholar@gmail.com)

<https://orcid.org/0000-0002-2285-7406>

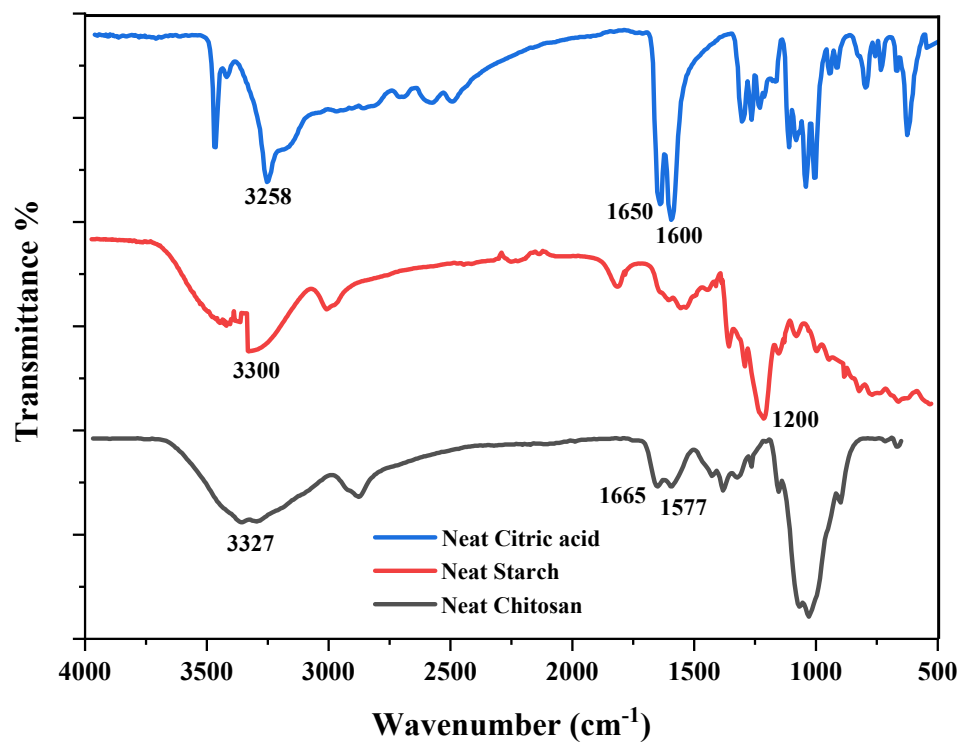

**Fig S1.** FTIR spectra of neat components

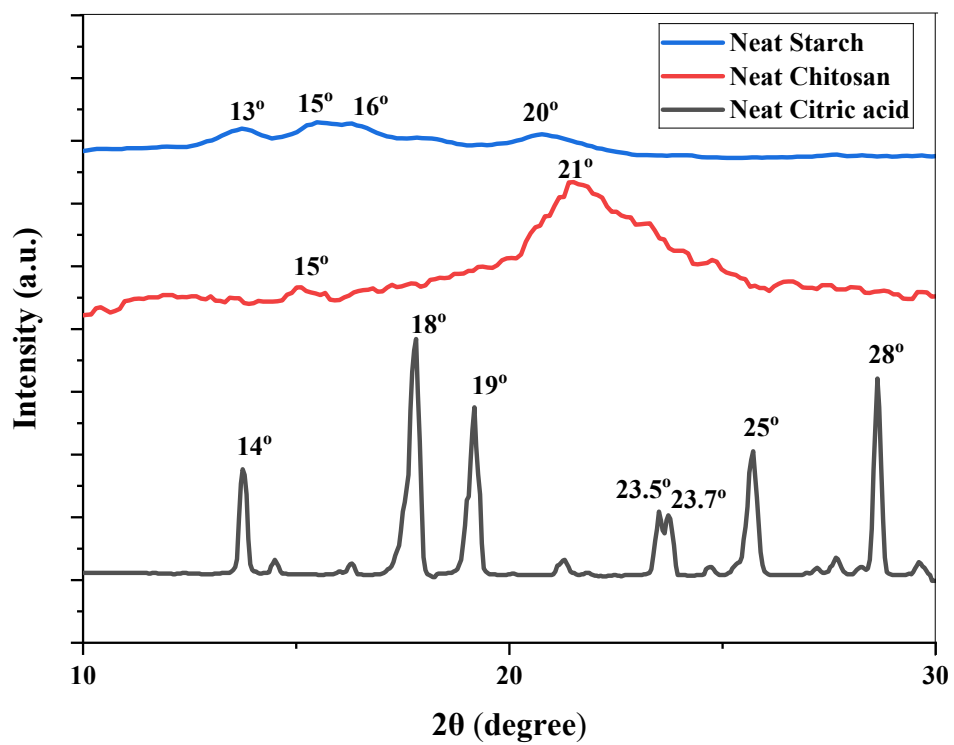

Fig. S2 XRD graphs of neat components
